# Supplementary material for: A self-defined intermediate product captured from the evolution process from a six-pod to an octahedral PbS sub-micrometer particle
Source: Royal Society of Chemistry journal article supplement (doi:10.1039/c7ce00239d), 2017-01-01
Supplement: c7ce00239d1.pdf [file c7ce00239d1.pdf]

## Supporting Information

### Self-defined intermediate product captured from the evolution process from six-pod to octahedral PbS sub-micrometer particle

Longfeng Li,<sup>ab</sup> Long Tian,<sup>c</sup> Yongxing Liu,<sup>c</sup> Dan Liu,<sup>c</sup> Chengyu Li,<sup>c</sup> Mingzhu Liu,<sup>\*ab</sup> and Cheng Wang<sup>\*c</sup>

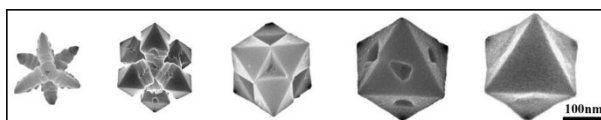

Figure S1 Schematic pattern of the evolution of HO.

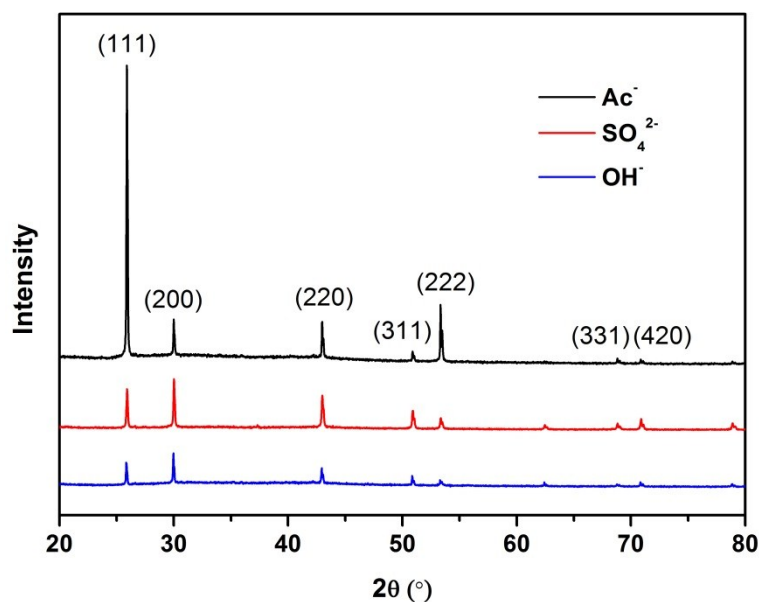

Figure S2 XRD patterns of the products prepared using different anions instead of Cl<sup>-</sup>.
